# Supplementary material for: Electronic structure study of dual-doped II–VI semiconductor quantum dots towards single-source white light emission
Source: Royal Society of Chemistry journal article supplement (doi:10.1039/d3nr03542e), 2023-01-01
Supplement: d3nr03542e1.pdf [file d3nr03542e1.pdf]

## Supplementary Information

### Electronic Structure Study of Dual Doped II-VI Semiconductor Quantum Dots Towards Single-Source White Light Emission

*Payel Mondal,<sup>a</sup> Sowmeya Sathiyamani,<sup>a</sup> Subham Das,<sup>a</sup> and Ranjani Viswanatha<sup>\*,a,b</sup>*

<sup>a</sup>New Chemistry Unit, and <sup>b</sup>International Centre for Materials Science

Jawaharlal Nehru Centre for Advanced Scientific Research, Jakkur, Bangalore 560064, India.

\*E-mail: [rv@jncasr.ac.in](mailto:rv@jncasr.ac.in)

**Table S1** The amount of incorporated Cd (x) in  $\text{Cd}_x\text{Zn}_{1-x}\text{Se}$  host NCs for different samples obtained from ICP-OES analysis.

| Sample | x value |
|--------|---------|
| S1     | 0.10    |
| S2     | 0.175   |
| S3     | 0.31    |
| S4     | 0.42    |
| S5     | 0.44    |
| S6     | 0.51    |

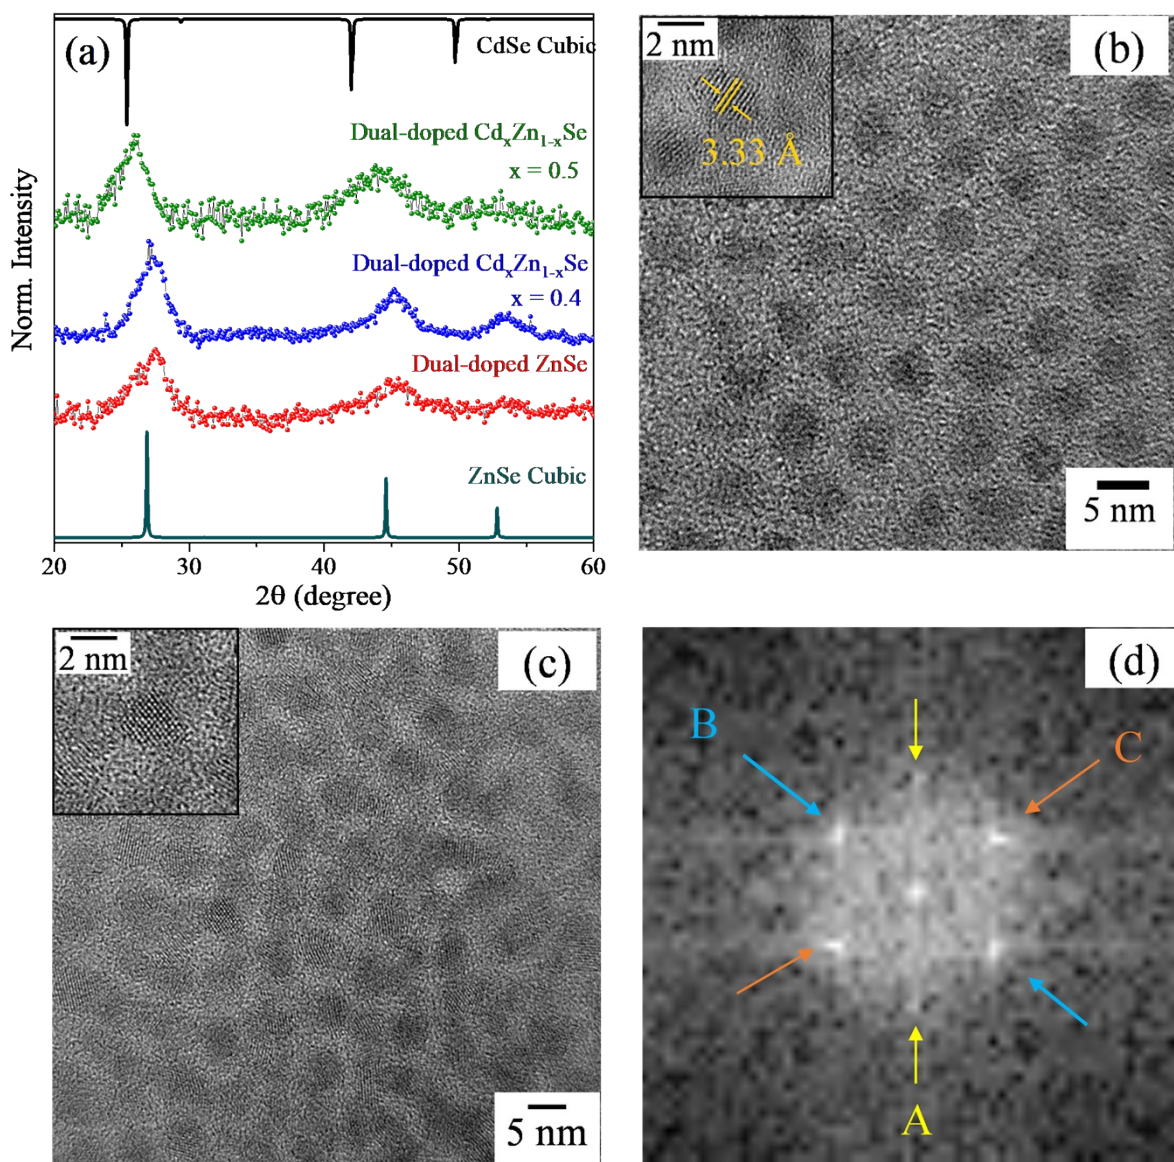

**Fig. S1** (a) X-ray diffraction patterns of Cu, Mn dual-doped ZnSe and  $\text{Cd}_x\text{Zn}_{1-x}\text{Se}$  QDs with increasing Cd content along with the ZnSe and CdSe bulk cubic patterns. TEM images of (b) dual-doped ZnSe and (c) dual-doped  $\text{Cd}_x\text{Zn}_{1-x}\text{Se}$  QDs. Corresponding HRTEM images are shown in the inset to (b) and (c) respectively. (d) Fourier transform of dual-doped  $\text{Cd}_x\text{Zn}_{1-x}\text{Se}$  shows three distinct planes namely,  $d(111)_{\text{CdSe}}$ ,  $d(111)_{\text{ZnSe}}$  and  $d(200)_{\text{CdSe}}$ , marked as 'A', 'B', and 'C' respectively.

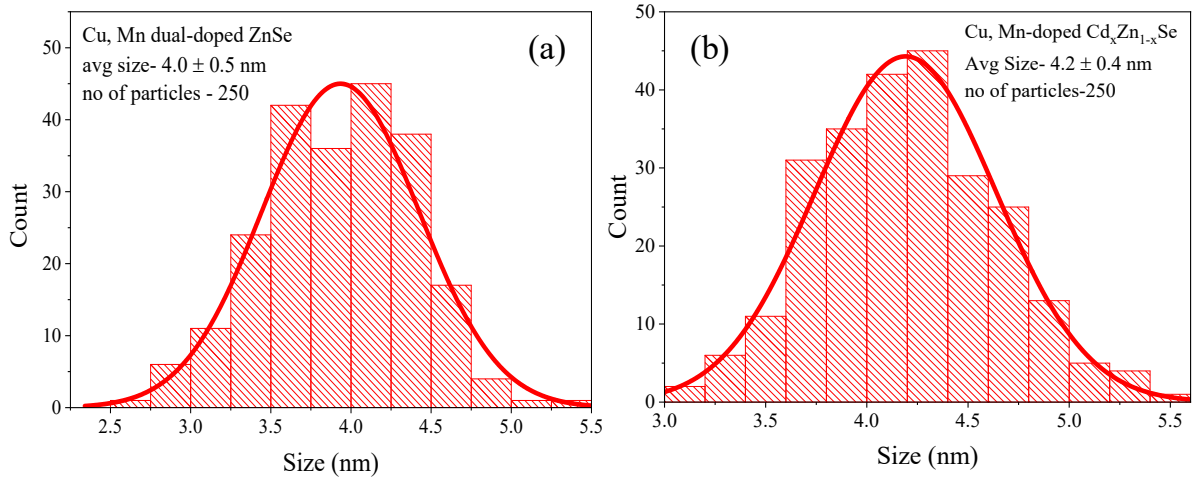

**Fig. S2** Particle size distribution histogram of (a) Cu, Mn dual-doped ZnSe, and (b) Cu, Mn dual-doped  $\text{Cd}_x\text{Zn}_{1-x}\text{Se}$  QDs showing the average size of the QDs are  $4.0 \pm 0.5$  nm, and  $4.2 \pm 0.4$  nm respectively.

**Table S2** Fitting summary of decay dynamics of Mn emission. Cu, Mn ZnSe\_1, 2, 3, 4 represents the Cu annealing time of 20, 30, 45, and 60 minutes respectively.

| Sample name   | $A_1$ | $t_1$ ( $\mu\text{s}$ ) | $A_2$ | $t_2$ ( $\mu\text{s}$ ) | $A_3$ | $t_3$ ( $\mu\text{s}$ ) |
|---------------|-------|-------------------------|-------|-------------------------|-------|-------------------------|
| Mn-ZnSe       | ---   | ---                     | ---   | ---                     | 0.88  | 244                     |
| Cu, Mn ZnSe_1 | 0.29  | 5                       | 0.22  | 111                     | 0.49  | 476                     |
| Cu, Mn ZnSe_2 | 0.33  | 5                       | 0.20  | 159                     | 0.46  | 630                     |
| Cu, Mn ZnSe_3 | 0.62  | 12                      | 0.14  | 291                     | 0.25  | 872                     |
| Cu, Mn ZnSe_4 | 0.77  | 10                      | 0.08  | 275                     | 0.16  | 923                     |

**Table S3** Fitting summary of decay dynamics of Cu emission. Cu, Mn ZnSe\_1, 2, 3, 4 represents the Cu annealing time of 20, 30, 45, and 60 minutes respectively.

| Sample name   | $A_1$ | $t_1$ (ns) | $A_2$ | $t_2$ (ns) | $A_3$ | $t_3$ (ns) |
|---------------|-------|------------|-------|------------|-------|------------|
| Cu-ZnSe       | ---   | ---        | 0.82  | 4.6        | 0.18  | 21         |
| Cu, Mn ZnSe_1 | 0.68  | 3.7        | 0.38  | 13.2       | 0.07  | 95         |
| Cu, Mn ZnSe_2 | 0.66  | 3.5        | 0.40  | 12.9       | 0.08  | 96         |

|               |      |     |      |      |      |     |
|---------------|------|-----|------|------|------|-----|
| Cu, Mn ZnSe_3 | 0.65 | 3.9 | 0.37 | 13.7 | 0.08 | 96  |
| Cu, Mn ZnSe_4 | 0.68 | 4.1 | 0.30 | 16.6 | 0.14 | 111 |

**Table S4** The stoichiometric percentages of Cu precursor, percentages of Cu ions incorporated into ZnSe host lattice for different samples and their quantum yield.

| Sample name | Stoichiometric Cu percentages | Cu percentages from ICP | Quantum yield (%) |
|-------------|-------------------------------|-------------------------|-------------------|
| Cu_1        | 1.5 %                         | 1 %                     | 20 %              |
| Cu_2        | 3.0 %                         | 1 %                     | 22 %              |
| Cu_3        | 4.5 %                         | 1 %                     | 9.5 %             |

**Table S5** Quantum yield of the dual-doped NCs with varying the TOP concentration

| Sample name | TOP amount (mL) | Quantum yield (%) |
|-------------|-----------------|-------------------|
| TOP_1       | 1.00 mL         | 18 %              |
| TOP_2       | 0.50 mL         | 35 %              |
| TOP_3       | 0.25 mL         | 32 %              |

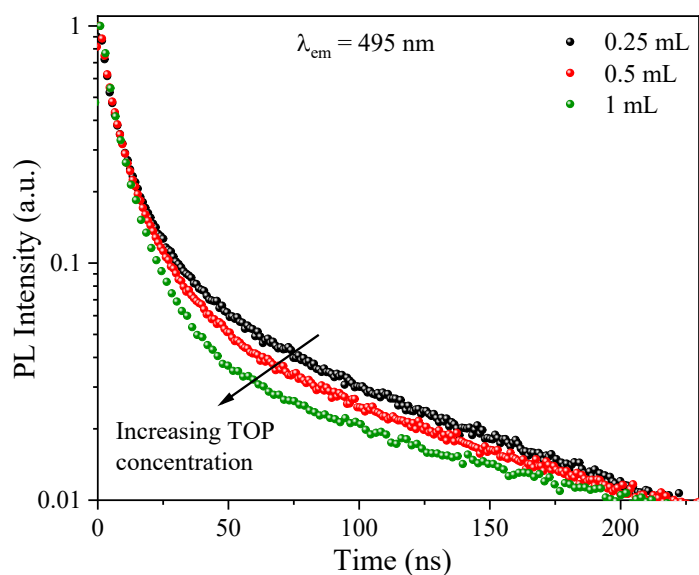

**Fig. S3** TrPL dynamics of Cu emission (495 nm) in Cu, Mn dual-doped ZnSe nanocrystals with varying TOP concentration.

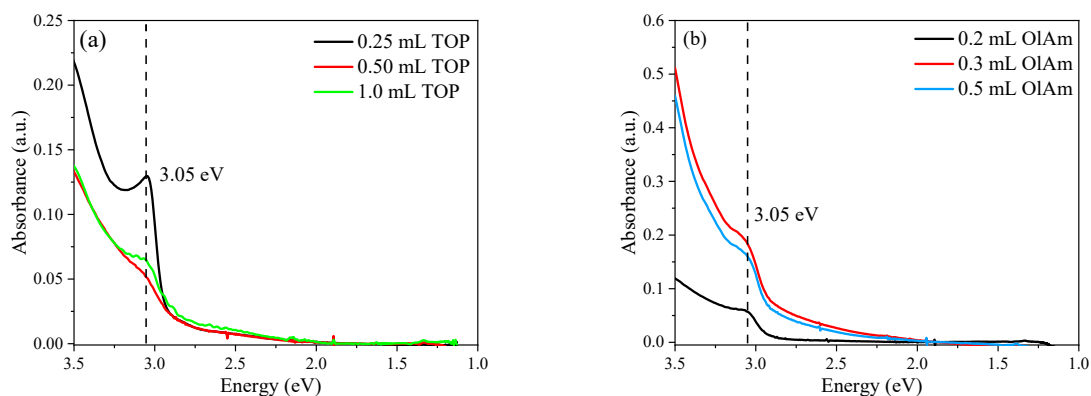

**Fig. S4** Absorbance of the Mn, Cu dual doped QDs with varying concentrations of (a) TOP and (b) OIAM.

**Table S6** Quantum yield of the dual-doped NCs with varying the oleylamine (OIAM) concentration

| Sample name | OIAM amount (mL) | Quantum yield (%) |
|-------------|------------------|-------------------|
| OIAM_1      | 0.2 mL           | 26.0 %            |
| OIAM_2      | 0.3 mL           | 26.5 %            |
| OIAM_3      | 0.5 mL           | 28.0 %            |

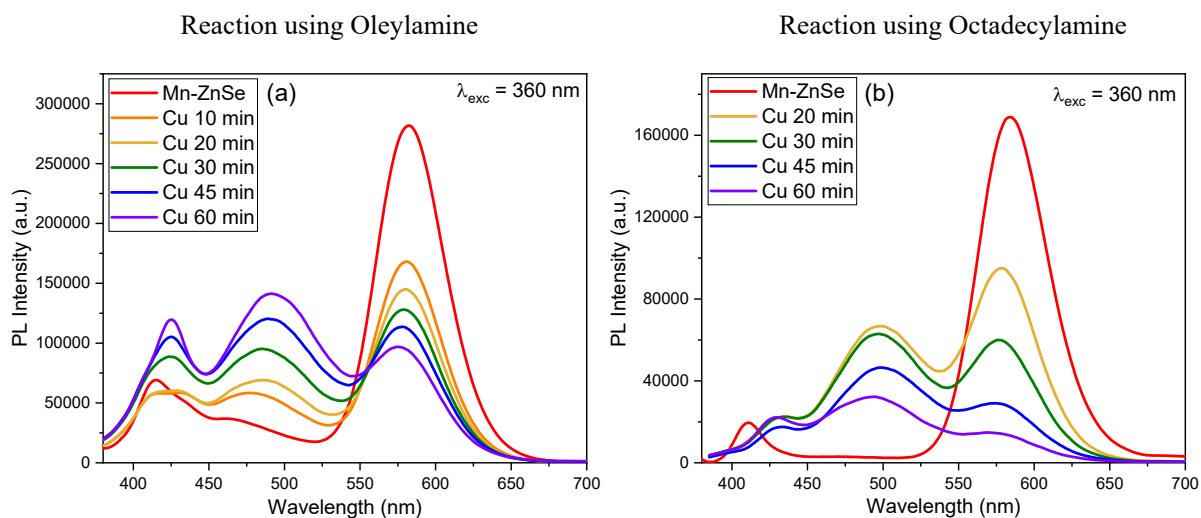

**Fig. S5** Evolution of PL bands in Cu, Mn dual-doped ZnSe QDs when reacted with (a) oleylamine and (b) octadecylamine.

**Table S7** Quantum yield of the dual-doped ZnSe QDs as a function of annealing time.

| Sample name with annealing time | Quantum yield (%) |
|---------------------------------|-------------------|
| 1_5 min                         | 19.5 %            |
| 2_10 min                        | 19 %              |
| 3_15 min                        | 18 %              |
| 4_20 min                        | 22 %              |
| 5_30 min                        | 23 %              |
| 6_45 min                        | 24 %              |
| 7_60 min                        | 26 %              |

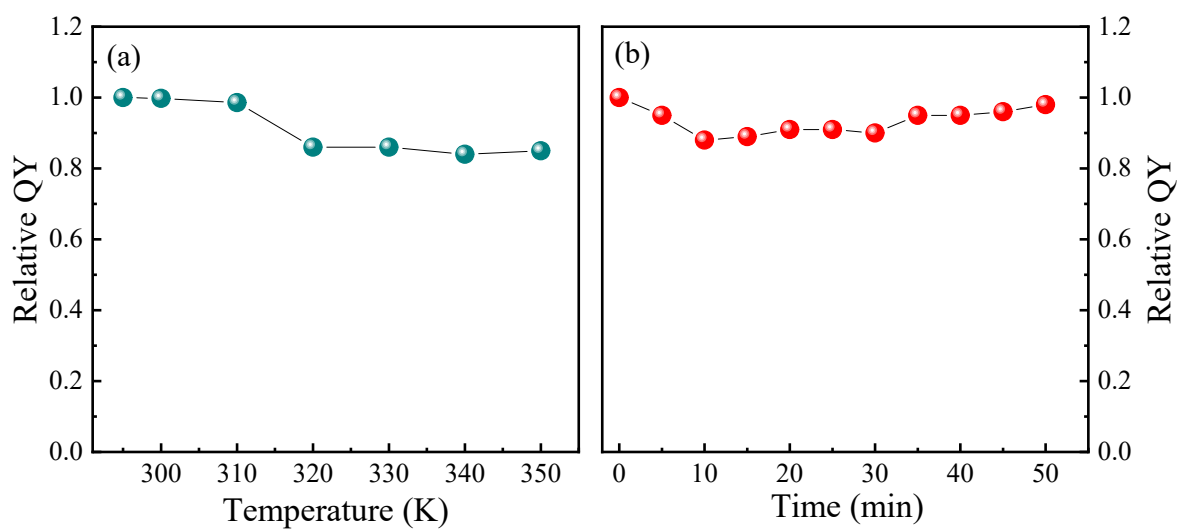

**Fig. S6** The relative quantum yield of Cu, Mn dual-doped ZnSe QDs as a function of (a) temperature, and (b) continuous excitation.
